# Supplementary material
Source: publisher site journal article supplement (https://www.dovepress.com/article/355980)
Supplement: Supplementary file 1 [file get_supplementary_file.php]

Supplementary Table 1: Collinearity diagnostics steps.

|  | VIF | | | | | | | |
| --- | --- | --- | --- | --- | --- | --- | --- | --- |
|  | Step 1 | Step 2 | Step 3 | Step 4 | Step 5 | Step 6 | Step 7 | Step 8 |
| NHHR | 11.7 | 11.7 | 11.7 | 4.7 | 2 | 2 | 2 | 1.9 |
| Sex | 3.1 | 3.1 | 3.1 | 3.1 | 3.1 | 2.1 | 2.1 | 1.9 |
| Age | 1.4 | 1.4 | 1.4 | 1.4 | 1.4 | 1.3 | 1.2 | 1.2 |
| Fatty liver | 1.6 | 1.6 | 1.6 | 1.6 | 1.5 | 1.5 | 1.5 | 1.5 |
| Weight | 9.2 | 9.2 | 9.2 | 9.2 | 9.2 | NA | NA | NA |
| Habit of exercise | 1 | 1 | 1 | 1 | 1 | 1 | 1 | 1 |
| BMI | 6.6 | 6.6 | 6.6 | 6.6 | 6.6 | 4.4 | 4.4 | 1.8 |
| WC | 6 | 6 | 6 | 6 | 6 | 5 | 5 | NA |
| ALT | 4.2 | 4.2 | 4.2 | 4.2 | 4.2 | 4.2 | 4.1 | 4.1 |
| AST | 3.3 | 3.3 | 3.3 | 3.3 | 3.3 | 3.3 | 3.3 | 3.3 |
| GGT | 1.5 | 1.5 | 1.5 | 1.5 | 1.5 | 1.5 | 1.5 | 1.5 |
| HDL-C | Inf | NA | NA | NA | NA | NA | NA | NA |
| TC | Inf | 21.9 | 21.9 | 11.6 | 1.4 | 1.4 | 1.4 | 1.4 |
| TG | Inf | Inf | NA | NA | NA | NA | NA | NA |
| Non-HDL-C | Inf | Inf | 112 | NA | NA | NA | NA | NA |
| LDL-C | Inf | Inf | 48.7 | 18.4 | NA | NA | NA | NA |
| FPG | 1.5 | 1.5 | 1.5 | 1.5 | 1.5 | 1.5 | 1.5 | 1.5 |
| HbA1c | 1.3 | 1.3 | 1.3 | 1.3 | 1.3 | 1.3 | 1.3 | 1.2 |
| Drinking status | 1.3 | 1.3 | 1.3 | 1.3 | 1.3 | 1.3 | 1.3 | 1.3 |
| Smoking status | 1.4 | 1.4 | 1.4 | 1.4 | 1.4 | 1.4 | 1.4 | 1.4 |
| SBP | 5.6 | 5.6 | 5.6 | 5.6 | 5.6 | 5.6 | 1.4 | 1.4 |
| DBP | 5.7 | 5.7 | 5.7 | 5.7 | 5.7 | 5.7 | NA | NA |

Abbreviation: VIF: variance inflation factor; BMI: body mass index; WC: Waist circumference; ALT: alanine aminotransferase; AST: aspartate aminotransferase; GGT: gamma-glutamyl transferase; HDL-C: high-density lipoprotein cholesterol; TC: total cholesterol; Non-HDL-C: non-high-density lipoprotein cholesterol; LDL-C: Low-density lipoprotein cholesterol; TG: triglyceride; NHHR: non-high-density lipoprotein cholesterol to high-density lipoprotein cholesterol ratio; HbA1c: hemoglobin A1c; FPG: fasting plasma glucose; SBP: systolic blood pressure; DBP: Diastolic blood pressure; Inf: infinity;

Note: VIF = 1/(1-R2). The variables with VIF>5 will be regarded as collinear variables and cannot be included in the multiple regression model.
